# Supplementary material for: A mitochondrial carrier transports glycolytic intermediates to link cytosolic and mitochondrial glycolysis in the human gut parasite Blastocystis
Source: eLife journal article supplement (doi:10.7554/elife.94187), 2024-01-05

**B**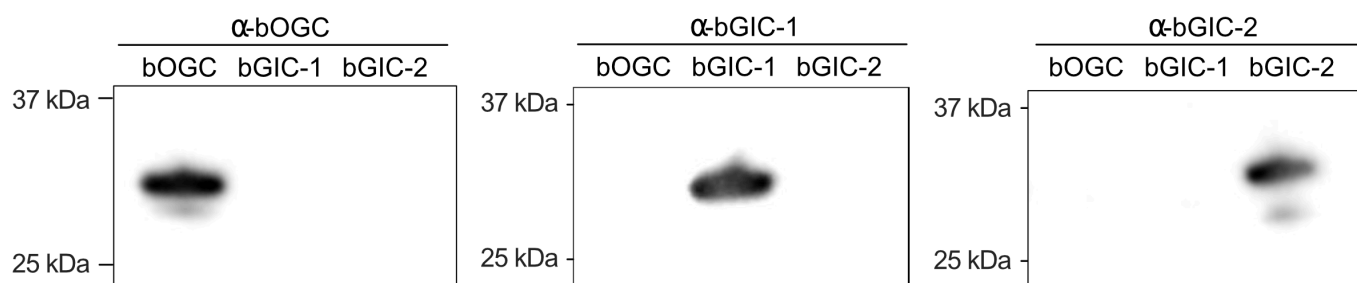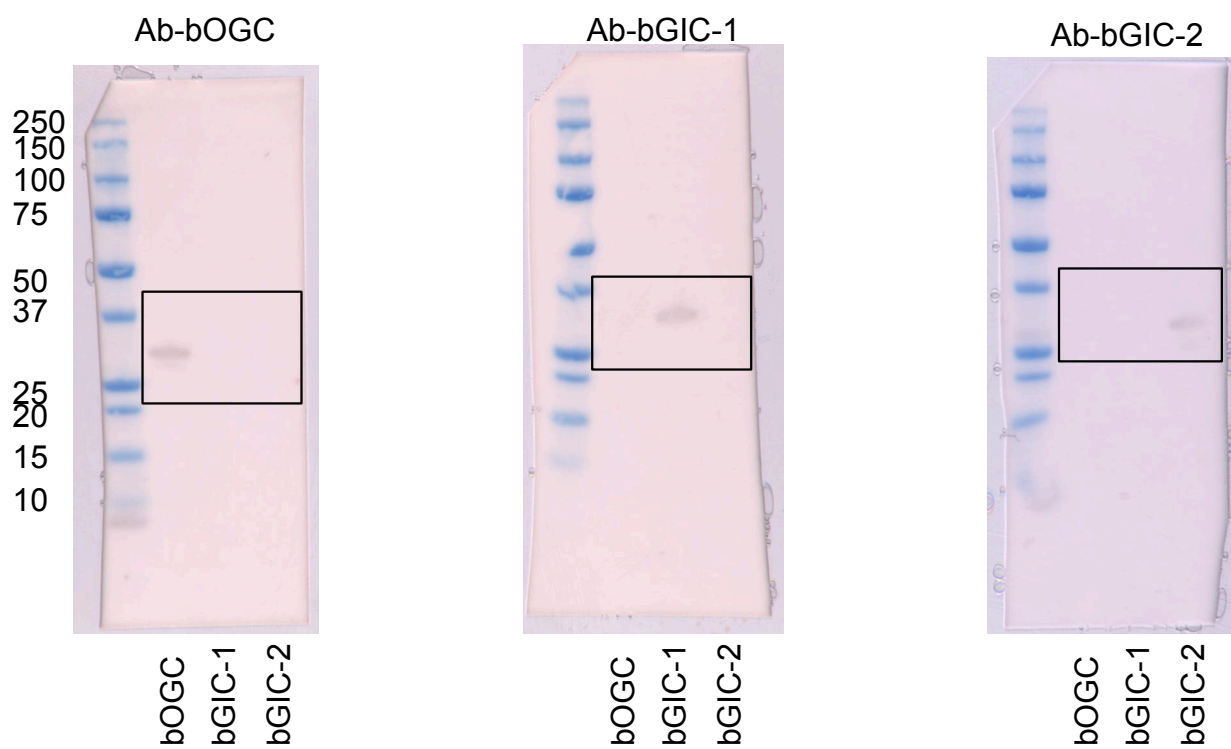

Supplement: fig2-data2 [file elife-94187-fig2-data2-v1.pdf]
