# Supplementary material for: A mitochondrial carrier transports glycolytic intermediates to link cytosolic and mitochondrial glycolysis in the human gut parasite Blastocystis
Source: eLife journal article supplement (doi:10.7554/elife.94187), 2024-01-05

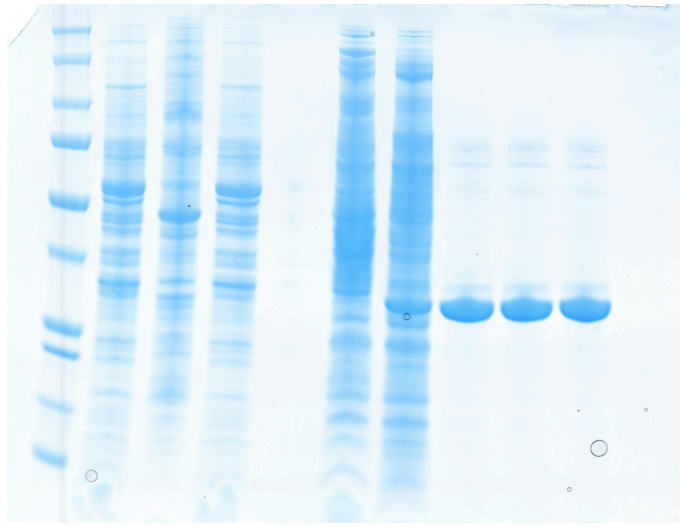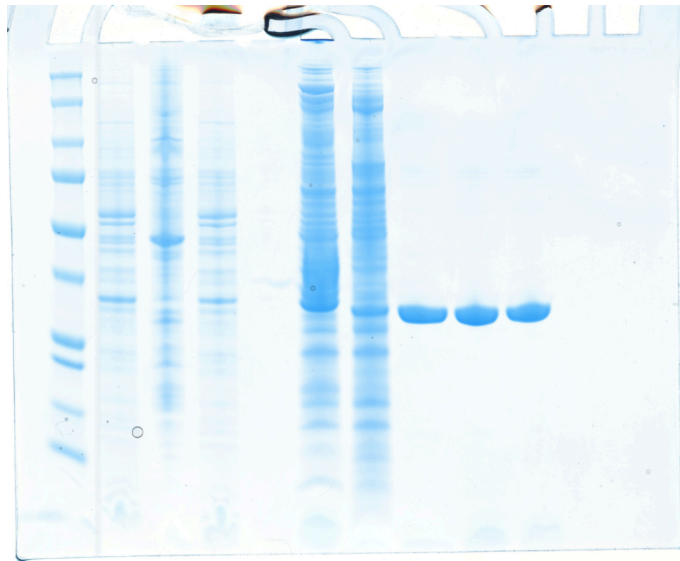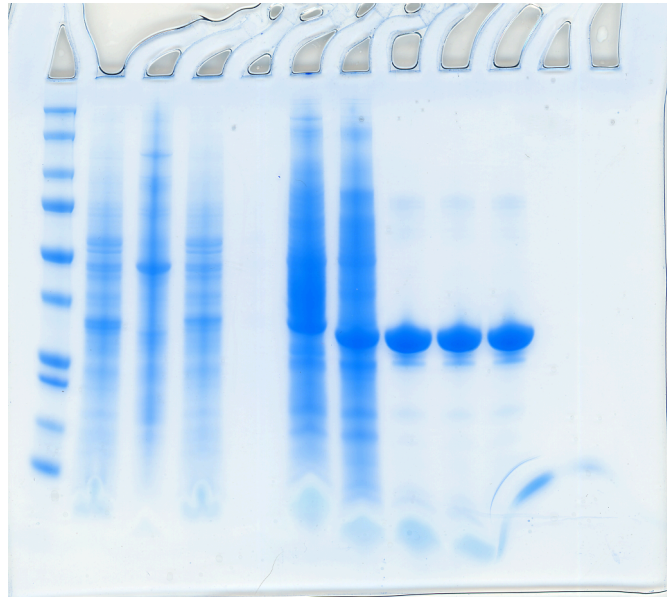

Supplement: fig3-data1 [file elife-94187-fig3-data1-v1.pdf]
