# Supplementary material for: A mitochondrial carrier transports glycolytic intermediates to link cytosolic and mitochondrial glycolysis in the human gut parasite Blastocystis
Source: eLife. 2024 May 23;13:RP94187. doi: 10.7554/eLife.94187 (PMC11115451; doi:10.7554/eLife.94187)
Supplement: Figure 3—source data 3. [file elife-94187-fig3-data3.xlsx]

## Sheet: Figure_3B
		Ratio (350/330 nm)
	Temperature	hOGC	bGIC-1	bGIC-2
	25	0.7	0.654	0.668
	25.2	0.701	0.654	0.668
	25.4	0.701	0.655	0.668
	25.6	0.702	0.655	0.67
	25.8	0.702	0.655	0.668
	26	0.703	0.656	0.669
	26.2	0.704	0.656	0.671
	26.4	0.703	0.656	0.669
	26.6	0.703	0.656	0.67
	26.8	0.705	0.657	0.671
	27	0.705	0.657	0.671
	27.2	0.705	0.656	0.672
	27.4	0.705	0.657	0.671
	27.6	0.706	0.658	0.672
	27.8	0.706	0.658	0.671
	28	0.709	0.657	0.671
	28.2	0.707	0.657	0.674
	28.4	0.707	0.659	0.674
	28.6	0.71	0.659	0.676
	28.8	0.711	0.659	0.676
	29	0.71	0.66	0.677
	29.2	0.71	0.66	0.677
	29.4	0.71	0.66	0.676
	29.6	0.711	0.66	0.675
	29.8	0.711	0.662	0.676
	30	0.712	0.661	0.678
	30.2	0.713	0.662	0.678
	30.4	0.712	0.661	0.679
	30.6	0.713	0.663	0.679
	30.8	0.713	0.663	0.68
	31	0.714	0.665	0.68
	31.2	0.715	0.665	0.679
	31.4	0.715	0.665	0.68
	31.6	0.715	0.664	0.679
	31.8	0.715	0.665	0.68
	32	0.715	0.665	0.681
	32.2	0.715	0.665	0.681
	32.4	0.717	0.665	0.679
	32.6	0.718	0.666	0.683
	32.8	0.719	0.665	0.683
	33	0.719	0.665	0.683
	33.2	0.72	0.666	0.681
	33.4	0.72	0.666	0.684
	33.6	0.721	0.667	0.683
	33.8	0.722	0.668	0.684
	34	0.723	0.668	0.685
	34.2	0.723	0.668	0.686
	34.4	0.723	0.669	0.685
	34.6	0.723	0.669	0.683
	34.8	0.725	0.67	0.687
	35	0.725	0.67	0.687
	35.2	0.724	0.671	0.685
	35.4	0.726	0.67	0.687
	35.6	0.726	0.669	0.687
	35.8	0.726	0.671	0.686
	36	0.725	0.672	0.687
	36.2	0.726	0.672	0.688
	36.4	0.727	0.672	0.688
	36.6	0.727	0.672	0.688
	36.8	0.727	0.673	0.688
	37	0.728	0.672	0.689
	37.2	0.73	0.674	0.691
	37.4	0.728	0.675	0.691
	37.6	0.731	0.675	0.691
	37.8	0.731	0.673	0.691
	38	0.732	0.674	0.69
	38.2	0.731	0.676	0.69
	38.4	0.732	0.676	0.691
	38.6	0.732	0.676	0.693
	38.8	0.734	0.678	0.694
	39	0.735	0.678	0.694
	39.2	0.734	0.677	0.693
	39.4	0.735	0.678	0.693
	39.6	0.735	0.679	0.695
	39.8	0.735	0.679	0.695
	40	0.736	0.679	0.695
	40.2	0.736	0.68	0.695
	40.4	0.735	0.68	0.695
	40.6	0.737	0.68	0.695
	40.8	0.737	0.68	0.696
	41	0.738	0.681	0.696
	41.2	0.739	0.681	0.696
	41.4	0.739	0.682	0.697
	41.6	0.74	0.682	0.698
	41.8	0.74	0.683	0.699
	42	0.741	0.683	0.699
	42.2	0.742	0.683	0.701
	42.4	0.742	0.684	0.7
	42.6	0.743	0.686	0.701
	42.8	0.744	0.685	0.701
	43	0.744	0.685	0.701
	43.2	0.745	0.686	0.7
	43.4	0.746	0.687	0.7
	43.6	0.746	0.687	0.701
	43.8	0.746	0.688	0.702
	44	0.747	0.688	0.703
	44.2	0.748	0.689	0.705
	44.4	0.75	0.689	0.706
	44.6	0.75	0.69	0.705
	44.8	0.751	0.691	0.705
	45	0.751	0.691	0.705
	45.2	0.751	0.691	0.705
	45.4	0.753	0.692	0.706
	45.6	0.754	0.692	0.708
	45.8	0.754	0.693	0.709
	46	0.755	0.694	0.71
	46.2	0.755	0.694	0.71
	46.4	0.756	0.694	0.71
	46.6	0.758	0.695	0.712
	46.8	0.757	0.695	0.712
	47	0.76	0.697	0.71
	47.2	0.761	0.696	0.712
	47.4	0.761	0.695	0.713
	47.6	0.762	0.696	0.714
	47.8	0.763	0.698	0.714
	48	0.765	0.699	0.714
	48.2	0.766	0.7	0.715
	48.4	0.767	0.7	0.716
	48.6	0.769	0.7	0.718
	48.8	0.771	0.702	0.717
	49	0.772	0.702	0.719
	49.2	0.774	0.701	0.72
	49.4	0.776	0.702	0.721
	49.6	0.777	0.704	0.72
	49.8	0.781	0.705	0.721
	50	0.784	0.706	0.722
	50.2	0.785	0.705	0.723
	50.4	0.787	0.705	0.723
	50.6	0.789	0.706	0.726
	50.8	0.792	0.706	0.729
	51	0.795	0.709	0.726
	51.2	0.798	0.709	0.727
	51.4	0.804	0.71	0.728
	51.6	0.806	0.712	0.73
	51.8	0.81	0.711	0.73
	52	0.814	0.712	0.732
	52.2	0.818	0.713	0.733
	52.4	0.821	0.715	0.734
	52.6	0.826	0.716	0.736
	52.8	0.831	0.715	0.737
	53	0.834	0.717	0.739
	53.2	0.838	0.718	0.739
	53.4	0.841	0.72	0.74
	53.6	0.849	0.72	0.742
	53.8	0.851	0.721	0.743
	54	0.854	0.722	0.745
	54.2	0.857	0.724	0.747
	54.4	0.862	0.725	0.749
	54.6	0.866	0.727	0.75
	54.8	0.868	0.728	0.753
	55	0.867	0.729	0.755
	55.2	0.868	0.732	0.757
	55.4	0.872	0.731	0.759
	55.6	0.871	0.733	0.761
	55.8	0.87	0.733	0.763
	56	0.874	0.735	0.764
	56.2	0.875	0.736	0.768
	56.4	0.876	0.741	0.769
	56.6	0.881	0.745	0.773
	56.8	0.882	0.746	0.777
	57	0.881	0.748	0.779
	57.2	0.88	0.75	0.781
	57.4	0.881	0.752	0.784
	57.6	0.883	0.754	0.787
	57.8	0.885	0.757	0.791
	58	0.884	0.76	0.796
	58.2	0.885	0.763	0.8
	58.4	0.885	0.767	0.8
	58.6	0.886	0.771	0.805
	58.8	0.886	0.775	0.808
	59	0.887	0.78	0.812
	59.2	0.887	0.783	0.814
	59.4	0.888	0.787	0.818
	59.6	0.89	0.791	0.823
	59.8	0.891	0.797	0.828
	60	0.891	0.802	0.833
	60.2	0.894	0.807	0.838
	60.4	0.894	0.812	0.841
	60.6	0.89	0.816	0.844
	60.8	0.894	0.821	0.848
	61	0.892	0.826	0.85
	61.2	0.893	0.831	0.856
	61.4	0.896	0.837	0.86
	61.6	0.896	0.842	0.864
	61.8	0.896	0.848	0.867
	62	0.896	0.853	0.869
	62.2	0.896	0.857	0.874
	62.4	0.898	0.861	0.879
	62.6	0.899	0.867	0.882
	62.8	0.897	0.87	0.881
	63	0.899	0.874	0.886
	63.2	0.898	0.876	0.888
	63.4	0.899	0.881	0.89
	63.6	0.9	0.884	0.892
	63.8	0.9	0.885	0.895
	64	0.901	0.888	0.896
	64.2	0.902	0.89	0.898
	64.4	0.903	0.89	0.901
	64.6	0.902	0.891	0.901
	64.8	0.904	0.893	0.901
	65	0.903	0.895	0.903
	65.2	0.903	0.895	0.905
	65.4	0.906	0.895	0.905
	65.6	0.904	0.897	0.905
	65.8	0.905	0.896	0.908
	66	0.905	0.899	0.909
	66.2	0.905	0.9	0.907
	66.4	0.906	0.899	0.908
	66.6	0.907	0.9	0.91
	66.8	0.908	0.9	0.911
	67	0.908	0.9	0.914
	67.2	0.909	0.904	0.915
	67.4	0.912	0.902	0.915
	67.6	0.906	0.9	0.913
	67.8	0.909	0.901	0.915
	68	0.909	0.903	0.915
	68.2	0.91	0.903	0.917
	68.4	0.912	0.903	0.917
	68.6	0.912	0.904	0.919
	68.8	0.911	0.904	0.92
	69	0.912	0.904	0.92
	69.2	0.912	0.907	0.92
	69.4	0.91	0.905	0.919
	69.6	0.912	0.905	0.92
	69.8	0.913	0.905	0.923
	70	0.913	0.907	0.923
	70.2	0.916	0.905	0.922
	70.4	0.915	0.907	0.924
	70.6	0.914	0.908	0.924
	70.8	0.915	0.909	0.923
	71	0.915	0.909	0.924
	71.2	0.916	0.909	0.926
	71.4	0.916	0.911	0.926
	71.6	0.916	0.911	0.926
	71.8	0.919	0.91	0.928
	72	0.918	0.91	0.928
	72.2	0.916	0.911	0.93
	72.4	0.917	0.91	0.929
	72.6	0.919	0.914	0.93
	72.8	0.918	0.911	0.932
	73	0.919	0.912	0.933
	73.2	0.92	0.915	0.935
	73.4	0.921	0.915	0.934
	73.6	0.921	0.915	0.933
	73.8	0.921	0.914	0.934
	74	0.921	0.916	0.934
	74.2	0.92	0.917	0.933
	74.4	0.921	0.916	0.935
	74.6	0.923	0.917	0.938
	74.8	0.925	0.918	0.938
	75	0.924	0.919	0.937
	75.2	0.924	0.918	0.938
	75.4	0.926	0.919	0.939
	75.6	0.926	0.921	0.939
	75.8	0.926	0.921	0.939
	76	0.926	0.92	0.939
	76.2	0.925	0.919	0.938
	76.4	0.929	0.92	0.941
	76.6	0.928	0.92	0.944
	76.8	0.926	0.922	0.94
	77	0.927	0.921	0.942
	77.2	0.924	0.925	0.942
	77.4	0.926	0.925	0.945
	77.6	0.928	0.924	0.946
	77.8	0.928	0.924	0.946
	78	0.927	0.924	0.945
	78.2	0.929	0.923	0.943
	78.4	0.932	0.923	0.945
	78.6	0.93	0.925	0.945
	78.8	0.932	0.926	0.948
	79	0.931	0.925	0.946
	79.2	0.929	0.925	0.947
	79.4	0.93	0.926	0.946
	79.6	0.932	0.928	0.947
	79.8	0.931	0.928	0.95
	80	0.931	0.928	0.949
	80.2	0.933	0.929	0.947
	80.4	0.934	0.931	0.949
	80.6	0.933	0.932	0.951
	80.8	0.934	0.93	0.952
	81	0.932	0.93	0.95
	81.2	0.936	0.933	0.951
	81.4	0.935	0.934	0.956
	81.6	0.932	0.93	0.954
	81.8	0.936	0.932	0.955
	82	0.935	0.934	0.952
	82.2	0.935	0.935	0.953
	82.4	0.936	0.935	0.955
	82.6	0.937	0.935	0.956
	82.8	0.937	0.934	0.957
	83	0.938	0.933	0.957
	83.2	0.939	0.932	0.958
	83.4	0.936	0.935	0.954
	83.6	0.937	0.936	0.956
	83.8	0.938	0.937	0.957
	84	0.94	0.937	0.957
	84.2	0.94	0.937	0.956
	84.4	0.941	0.937	0.957
	84.6	0.94	0.938	0.958
	84.8	0.94	0.938	0.959
	85	0.941	0.938	0.959
	85.2	0.94	0.936	0.959
	85.4	0.94	0.937	0.96
	85.6	0.942	0.937	0.961
	85.8	0.942	0.937	0.963
	86	0.944	0.94	0.958
	86.2	0.945	0.938	0.963
	86.4	0.944	0.939	0.962
	86.6	0.945	0.94	0.965
	86.8	0.941	0.939	0.965
	87	0.943	0.942	0.966
	87.2	0.945	0.943	0.967
	87.4	0.946	0.942	0.967
	87.6	0.946	0.942	0.965
	87.8	0.947	0.942	0.967
	88	0.948	0.941	0.966
	88.2	0.947	0.942	0.968
	88.4	0.948	0.943	0.966
	88.6	0.947	0.942	0.966
	88.8	0.948	0.943	0.968
	89	0.949	0.944	0.968
	89.2	0.949	0.946	0.968
	89.4	0.949	0.943	0.97
	89.6	0.951	0.944	0.968
	89.8	0.95	0.947	0.971
	90	0.951	0.943	0.972

## Sheet: Figure_3C
		dR/dT
	Temperature	hOGC	bGIC-1	bGIC-2
	25	0.002168	0.001282	0.001387
	25.2	0.002179	0.001287	0.001434
	25.4	0.00219	0.001294	0.001482
	25.6	0.002201	0.001302	0.001529
	25.8	0.002212	0.001312	0.001575
	26	0.002223	0.001323	0.001621
	26.2	0.002234	0.001336	0.001667
	26.4	0.002244	0.00135	0.001711
	26.6	0.002254	0.001365	0.001755
	26.8	0.002262	0.001381	0.001797
	27	0.002269	0.001398	0.001837
	27.2	0.002275	0.001416	0.001876
	27.4	0.002279	0.001434	0.001913
	27.6	0.002282	0.001451	0.001949
	27.8	0.002285	0.001469	0.001983
	28	0.00229	0.001488	0.002017
	28.2	0.002287	0.001533	0.002036
	28.4	0.002286	0.001582	0.002053
	28.6	0.002284	0.001635	0.002066
	28.8	0.002282	0.001687	0.002071
	29	0.002278	0.001736	0.002066
	29.2	0.00227	0.001777	0.00205
	29.4	0.00226	0.001806	0.002025
	29.6	0.002247	0.001821	0.001991
	29.8	0.002234	0.001821	0.001949
	30	0.002224	0.001808	0.001903
	30.2	0.002221	0.001783	0.001853
	30.4	0.002226	0.00175	0.001804
	30.6	0.002242	0.001714	0.001761
	30.8	0.002269	0.001677	0.001727
	31	0.002306	0.001645	0.001703
	31.2	0.002352	0.001618	0.00169
	31.4	0.002402	0.001599	0.001687
	31.6	0.002455	0.001587	0.001691
	31.8	0.002506	0.001581	0.001698
	32	0.002552	0.001577	0.001704
	32.2	0.002591	0.001574	0.001707
	32.4	0.002622	0.00157	0.001707
	32.6	0.002644	0.001565	0.001706
	32.8	0.002655	0.001559	0.001706
	33	0.002658	0.001555	0.001708
	33.2	0.002652	0.001555	0.001714
	33.4	0.002637	0.001561	0.001723
	33.6	0.002615	0.001575	0.001732
	33.8	0.002584	0.001597	0.001741
	34	0.002547	0.001627	0.001747
	34.2	0.002505	0.001661	0.001752
	34.4	0.002461	0.001695	0.001754
	34.6	0.002416	0.001726	0.001755
	34.8	0.002374	0.001751	0.001755
	35	0.002335	0.001768	0.001753
	35.2	0.002303	0.001778	0.001751
	35.4	0.002277	0.001781	0.001749
	35.6	0.00226	0.001781	0.001746
	35.8	0.002251	0.001782	0.001744
	36	0.002251	0.001785	0.001745
	36.2	0.00226	0.001794	0.001749
	36.4	0.002275	0.001809	0.001759
	36.6	0.002296	0.00183	0.001775
	36.8	0.002321	0.001858	0.001794
	37	0.002346	0.001889	0.001814
	37.2	0.002371	0.001923	0.001833
	37.4	0.002391	0.001955	0.001849
	37.6	0.002406	0.001984	0.001858
	37.8	0.002415	0.002006	0.001858
	38	0.002419	0.002021	0.001851
	38.2	0.002418	0.00203	0.001837
	38.4	0.002415	0.002032	0.001819
	38.6	0.002409	0.00203	0.001801
	38.8	0.002404	0.002025	0.001788
	39	0.0024	0.002019	0.001781
	39.2	0.002399	0.002015	0.001784
	39.4	0.002401	0.002014	0.001799
	39.6	0.002409	0.002016	0.001824
	39.8	0.002423	0.002021	0.001854
	40	0.002442	0.002026	0.001883
	40.2	0.002467	0.002033	0.001907
	40.4	0.002496	0.002041	0.001922
	40.6	0.002528	0.002052	0.001928
	40.8	0.002565	0.002066	0.001928
	41	0.002606	0.002085	0.001929
	41.2	0.002654	0.00211	0.001936
	41.4	0.00271	0.00214	0.001954
	41.6	0.002772	0.002177	0.001986
	41.8	0.00284	0.002219	0.00203
	42	0.002913	0.002264	0.002082
	42.2	0.002986	0.002309	0.002137
	42.4	0.003058	0.002353	0.00219
	42.6	0.003124	0.002394	0.002237
	42.8	0.003181	0.002429	0.002278
	43	0.00323	0.002457	0.002313
	43.2	0.003272	0.002476	0.002346
	43.4	0.00331	0.002488	0.002379
	43.6	0.003347	0.002493	0.002416
	43.8	0.003386	0.002492	0.002456
	44	0.00343	0.002486	0.0025
	44.2	0.003479	0.002477	0.002547
	44.4	0.003536	0.002466	0.002597
	44.6	0.0036	0.002455	0.002646
	44.8	0.003673	0.002446	0.002694
	45	0.003754	0.002442	0.002737
	45.2	0.003845	0.002442	0.002775
	45.4	0.003947	0.002447	0.002808
	45.6	0.004061	0.00246	0.002837
	45.8	0.004189	0.002479	0.002864
	46	0.004333	0.002504	0.002892
	46.2	0.004493	0.002534	0.002924
	46.4	0.00467	0.002569	0.002963
	46.6	0.004868	0.002608	0.003008
	46.8	0.005088	0.002651	0.003058
	47	0.005331	0.002696	0.003109
	47.2	0.005596	0.002742	0.003159
	47.4	0.005883	0.002787	0.003208
	47.6	0.006192	0.00283	0.003254
	47.8	0.006522	0.00287	0.0033
	48	0.006873	0.002908	0.003349
	48.2	0.007247	0.002945	0.003406
	48.4	0.007647	0.002983	0.003472
	48.6	0.008075	0.003025	0.00355
	48.8	0.008534	0.003071	0.003639
	49	0.009027	0.003122	0.003738
	49.2	0.009554	0.003179	0.003844
	49.4	0.010113	0.003238	0.003955
	49.6	0.010698	0.003298	0.004068
	49.8	0.011304	0.003358	0.004184
	50	0.011924	0.003418	0.0043
	50.2	0.012552	0.003481	0.004417
	50.4	0.013182	0.003548	0.004535
	50.6	0.013807	0.003621	0.004654
	50.8	0.014422	0.003701	0.004776
	51	0.015021	0.00379	0.004903
	51.2	0.015598	0.00389	0.005036
	51.4	0.016144	0.004	0.005178
	51.6	0.016647	0.004121	0.005332
	51.8	0.017094	0.004252	0.005499
	52	0.017469	0.004392	0.005681
	52.2	0.017755	0.00454	0.005877
	52.4	0.017939	0.004691	0.006088
	52.6	0.018005	0.004843	0.006312
	52.8	0.017947	0.004991	0.006549
	53	0.017763	0.005136	0.006798
	53.2	0.017461	0.005281	0.007058
	53.4	0.017054	0.005434	0.007328
	53.6	0.016558	0.0056	0.007608
	53.8	0.015991	0.005788	0.007898
	54	0.015367	0.006002	0.008199
	54.2	0.014701	0.006245	0.008513
	54.4	0.014002	0.006516	0.008841
	54.6	0.013277	0.00681	0.009188
	54.8	0.012531	0.007122	0.009555
	55	0.011767	0.007449	0.009943
	55.2	0.010991	0.007792	0.010351
	55.4	0.010213	0.008153	0.010775
	55.6	0.009443	0.008539	0.011208
	55.8	0.008695	0.008955	0.011644
	56	0.007984	0.009407	0.012077
	56.2	0.007323	0.009898	0.012502
	56.4	0.006725	0.010431	0.01292
	56.6	0.006201	0.011008	0.013334
	56.8	0.005756	0.011628	0.013749
	57	0.005389	0.012286	0.014169
	57.2	0.005093	0.012977	0.0146
	57.4	0.004853	0.013693	0.015041
	57.6	0.004653	0.014425	0.015488
	57.8	0.004475	0.015165	0.015932
	58	0.004308	0.015904	0.016365
	58.2	0.004142	0.016636	0.016777
	58.4	0.003975	0.017357	0.017159
	58.6	0.00381	0.018067	0.017505
	58.8	0.003653	0.018766	0.017812
	59	0.003512	0.019453	0.01808
	59.2	0.003391	0.020122	0.018309
	59.4	0.003291	0.020765	0.018501
	59.6	0.003211	0.021369	0.018653
	59.8	0.003146	0.021918	0.018764
	60	0.003091	0.022396	0.018832
	60.2	0.00304	0.022787	0.018852
	60.4	0.002988	0.023081	0.01882
	60.6	0.002933	0.023268	0.018728
	60.8	0.002872	0.023345	0.018571
	61	0.002807	0.023309	0.018347
	61.2	0.00274	0.023157	0.018052
	61.4	0.002673	0.022891	0.017687
	61.6	0.002609	0.022512	0.017255
	61.8	0.002551	0.022023	0.016764
	62	0.002503	0.02143	0.01622
	62.2	0.002466	0.020739	0.015637
	62.4	0.002439	0.01996	0.015023
	62.6	0.00242	0.019104	0.014386
	62.8	0.002404	0.018183	0.013732
	63	0.002388	0.017209	0.013065
	63.2	0.002369	0.016194	0.012387
	63.4	0.002348	0.015153	0.011703
	63.6	0.002324	0.014098	0.01102
	63.8	0.002304	0.013044	0.010347
	64	0.002289	0.012006	0.009694
	64.2	0.002282	0.010994	0.009069
	64.4	0.002282	0.01002	0.008482
	64.6	0.002287	0.009092	0.007938
	64.8	0.002294	0.008216	0.007439
	65	0.002298	0.007399	0.006983
	65.2	0.002296	0.006644	0.006566
	65.4	0.002286	0.005954	0.006186
	65.6	0.002268	0.005332	0.00584
	65.8	0.002244	0.004781	0.005528
	66	0.002214	0.004302	0.005248
	66.2	0.002181	0.003892	0.004997
	66.4	0.002146	0.003544	0.004776
	66.6	0.002111	0.003253	0.004582
	66.8	0.002077	0.003008	0.004415
	67	0.002049	0.002802	0.004269
	67.2	0.002025	0.002626	0.004141
	67.4	0.002008	0.002476	0.004025
	67.6	0.001995	0.002347	0.003918
	67.8	0.001985	0.002238	0.003815
	68	0.001975	0.00215	0.003714
	68.2	0.001963	0.002083	0.003612
	68.4	0.001947	0.002037	0.003509
	68.6	0.00193	0.00201	0.003409
	68.8	0.001911	0.002	0.003314
	69	0.001892	0.002003	0.003229
	69.2	0.001876	0.002014	0.003158
	69.4	0.001864	0.002032	0.003104
	69.6	0.001857	0.00205	0.00307
	69.8	0.001854	0.002068	0.003055
	70	0.001855	0.002083	0.003057
	70.2	0.001861	0.002096	0.003072
	70.4	0.001871	0.00211	0.003096
	70.6	0.001886	0.002126	0.003122
	70.8	0.001903	0.002145	0.003146
	71	0.001921	0.00217	0.003163
	71.2	0.001937	0.002199	0.003172
	71.4	0.00195	0.002232	0.003174
	71.6	0.00196	0.002267	0.003171
	71.8	0.001967	0.0023	0.003163
	72	0.001974	0.00233	0.003155
	72.2	0.001984	0.002354	0.003148
	72.4	0.002001	0.002372	0.003143
	72.6	0.002026	0.002385	0.003136
	72.8	0.002061	0.002393	0.003124
	73	0.002102	0.002395	0.003104
	73.2	0.002147	0.002392	0.003073
	73.4	0.00219	0.002385	0.00303
	73.6	0.002224	0.002374	0.002974
	73.8	0.002244	0.00236	0.002908
	74	0.002246	0.002344	0.002836
	74.2	0.002228	0.002329	0.002766
	74.4	0.00219	0.002313	0.002705
	74.6	0.002135	0.002298	0.002654
	74.8	0.002068	0.002281	0.002615
	75	0.001997	0.002259	0.002586
	75.2	0.001928	0.002232	0.002567
	75.4	0.00187	0.002198	0.002555
	75.6	0.001825	0.002156	0.002546
	75.8	0.001793	0.002108	0.002534
	76	0.001769	0.002056	0.002516
	76.2	0.001749	0.002004	0.002491
	76.4	0.001726	0.001957	0.002459
	76.6	0.001694	0.00192	0.002422
	76.8	0.001654	0.001896	0.002384
	77	0.001607	0.001888	0.002346
	77.2	0.001561	0.001898	0.002313
	77.4	0.001522	0.001925	0.002287
	77.6	0.001496	0.001969	0.002268
	77.8	0.001488	0.002025	0.002255
	78	0.0015	0.002088	0.002248
	78.2	0.001532	0.002152	0.002246
	78.4	0.001577	0.002209	0.002246
	78.6	0.00163	0.002257	0.002249
	78.8	0.001683	0.002294	0.002254
	79	0.001732	0.002323	0.002261
	79.2	0.00177	0.002347	0.00227
	79.4	0.001793	0.002368	0.002284
	79.6	0.0018	0.002385	0.002302
	79.8	0.001793	0.002398	0.002324
	80	0.001776	0.002403	0.002347
	80.2	0.001753	0.002398	0.00237
	80.4	0.00173	0.002379	0.002388
	80.6	0.001711	0.002344	0.002396
	80.8	0.0017	0.002295	0.002391
	81	0.001699	0.002235	0.00237
	81.2	0.001704	0.002171	0.002333
	81.4	0.001712	0.002105	0.00228
	81.6	0.001719	0.00204	0.002215
	81.8	0.001721	0.001975	0.002143
	82	0.001717	0.001909	0.002071
	82.2	0.001705	0.001838	0.002001
	82.4	0.001688	0.001762	0.001939
	82.6	0.00167	0.001681	0.001884
	82.8	0.001657	0.001597	0.001839
	83	0.001653	0.001515	0.001807
	83.2	0.00166	0.001439	0.001789
	83.4	0.001676	0.001375	0.001786
	83.6	0.001699	0.001329	0.001801
	83.8	0.001726	0.001305	0.001834
	84	0.001752	0.001305	0.001884
	84.2	0.001775	0.001328	0.001948
	84.4	0.001793	0.001368	0.002024
	84.6	0.001809	0.00142	0.002106
	84.8	0.001824	0.001473	0.002191
	85	0.001843	0.001518	0.002274
	85.2	0.001867	0.001547	0.00235
	85.4	0.001896	0.001556	0.002413
	85.6	0.001929	0.001547	0.00246
	85.8	0.001964	0.001526	0.002489
	86	0.002001	0.0015	0.0025
	86.2	0.002037	0.001481	0.002493
	86.4	0.002072	0.001474	0.00247
	86.6	0.002106	0.001486	0.002436
	86.8	0.002136	0.001517	0.002399
	87	0.002163	0.001564	0.002365
	87.2	0.002181	0.001611	0.002356
	87.4	0.0022	0.001659	0.002363
	87.6	0.00222	0.001704	0.002371
	87.8	0.002242	0.001746	0.002378
	88	0.002264	0.001784	0.002381
	88.2	0.002286	0.001819	0.002383
	88.4	0.002308	0.001852	0.002383
	88.6	0.002331	0.001883	0.002383
	88.8	0.002353	0.001914	0.002384
	89	0.002376	0.001945	0.002387
	89.2	0.002398	0.001977	0.002394
	89.4	0.002421	0.00201	0.002404
	89.6	0.002444	0.002044	0.00242
	89.8	0.002468	0.002081	0.002441
	90	0.002492	0.002119	0.002467

## Sheet: Figure_3D_3E
	Time (secs)	bGIC-1 (malate transport)
		No internal control				bGIC-1
		Trial 1	Trial 2	Trial 1	Trial 2	Trial 1	Trial 2	Trial 3	Trial 4
	0	0.00315	0.004378	0.010797	0.011653	0.031233	0.025478	0.027282	0.030316
	10	0.007591	0.004504	0.010911	0.009454	0.047077	0.048776	0.046825	0.048522
	20	0.005449	0.004158	0.011739	0.01034	0.071845	0.07253	0.069735	0.06755
	30	0.004914	0.004536	0.011196	0.010539	0.111367	0.083177	0.102572	0.090049
	45	0.004441	0.004756	0.011682	0.011368	0.147037	0.154769	0.150708	0.144331
	60	0.00589	0.007024	0.01171	0.01271	0.166329	0.214394	0.191001	0.191695
	150	0.006142	0.006646	0.012824	0.011968	0.35309	0.283071	0.340449	0.293804
	300	0.01723	0.008694	0.011939	0.013224	0.539675	0.479669	0.552663	0.540501
	450	0.008946	0.007717	0.013853	0.015366	0.630558	0.682706	0.632581	0.645618
	600	0.007843	0.008568	0.01331	0.012339	0.668687	0.657633	0.574417	0.663463
		No internal control				bGIC-1
	rates	0.8956	1.8067	0.509	2.2299	227.037	243.244	145.584	187.804
