# Supplementary material for: A mitochondrial carrier transports glycolytic intermediates to link cytosolic and mitochondrial glycolysis in the human gut parasite Blastocystis
Source: eLife. 2024 May 23;13:RP94187. doi: 10.7554/eLife.94187 (PMC11115451; doi:10.7554/eLife.94187)
Supplement: Figure 4—source data 1. [file elife-94187-fig4-data1.xlsx]

## Sheet: Figure_4A
		∆Tm
		Biological repeat 1			Biological repeat 2
		Trial 1	Trial 2	Trial 3	Trial 1	Trial 2	Trial 3
	citrullin	0.2	0.1	0	0.1	0.1	0.7
	ornithine	0.3	0	0	0.1	0.2	0
	phosphate	-0.5	-0.1	-0.1	-0.1	-0.2	-0.3
	thiosulfate	-0.1	-0.6	-0.1	0.2	0.1	-0.1
	sulfate	-0.6	-0.3	-0.3	-0.5	-0.7	-0.7
	pyruvate	0.3	0.4	0.2	-0.5	0.2	0.2
	PEP	-0.4	-0.4	-0.5	-0.2	-0.4	-0.8
	3PG	-0.3	-0.2	-0.5	0.3	0.1	-0.4
	G3P	-0.7	-0.2	-0.6	-0.6	-0.8	-1
	DHAP	-0.3	-0.7	-0.3	-0.2	-0.5	-0.3
	F16BP	0.6	0.2	0.3	0.1	-0.5	-0.7
	F6P	0.6	0.2	0	-0.5	-0.3	-0.5
	G6P	-0.1	0.4	0.3	-0.1	0.3	0.1
	glucose	0.7	0.6	0.3	0.1	0	0.1
	valerate	2.3	1.1	0.5	0.7	0.9	0.8
	butyrate	0.6	0.4	0.5	0.2	0.2	0.3
	propionate	0.6	0.4	1	0.2	0.5	0.3
	acetate	0.2	0.5	0.2	0.1	0.3	0.8
	formate	0.1	0.1	0.4	0.2	-0.5	0
	lactate	0.2	0.1	0	0	-0.4	-0.7
	oxalic acid	-0.2	0	0.7	0.1	-0.3	0.1
	glutamate	0.2	0.3	0.3	0.2	-0.2	0.2
	glutarate	-0.5	-0.3	-0.3	-0.7	-0.6	-1.1
	2-aminoadipate	0.2	0.3	0.6	-0.1	-0.3	0.1
	2-oxopimelate	-0.4	-0.2	-0.4	0	-0.1	-0.3
	pimelate	-0.3	-0.3	-0.2	-0.2	-0.2	-0.2
	fumarate	-0.6	-0.4	-0.5	-0.2	-0.5	-0.2
	adipate	-0.5	-0.2	-0.2	-0.2	-0.1	-0.2
	2-oxoadipate	0.1	-0.5	1.2	0.3	0.1	0
	malonate	1.2	0.9	1.1	1.3	1.4	1.3
	maleate	3.1	3.2	3.2	2.9	2.9	3
	succinate	2.3	2.1	1.9	1.7	1.6	1.7
	L-malate	3.5	4	3.1	3.5	3.8	3.7
	oxaloacetate	0.3	0.1	0	0.1	0.2	0.1
	oxoglutarate	3.5	3.7	4.5	3.6	3.5	3.7
	trans-aconitate	0.5	0.4	0.3	0.3	0.4	0.4
	cis-aconitate	0.8	0.6	0.6	0.9	0.6	0.3
	isocitrate	-0.3	-0.1	-0.6	-0.1	-0.4	-0.2
	citrate	-0.6	-0.5	-0.3	-0.3	-0.4	-0.7

## Sheet: Figure_4B
		∆Tm
		Biological repeat 1			Biological repeat 2
		Trial 1	Trial 2	Trial 3	Trial 1	Trial 2	Trial 3
	citrullin	-0.1	-0.2	-0.4	-0.1	0.5	-0.1
	ornithine	-0.1	-0.1	-0.2	0.1	0.2	-0.1
	phosphate	3	3	3.3	3.2	3.6	3.3
	thiosulfate	3.7	3.7	4.5	3.8	3.8	4.4
	sulfate	3.2	2.8	2.9	3.4	3	3
	pyruvate	0.3	0.3	0.5	0.8	0.9	1.2
	PEP	0.3	0.6	0.5	0.9	0.6	1
	3PG	6.2	5.7	5.7	6.2	4.5	5.8
	G3P	2.4	1.9	2.7	2.7	2.8	2.9
	DHAP	-1.1	-1.1	0.1	0	0	-0.3
	F16BP	0.5	-0.2	-0.2	0.7	0.3	0.5
	F6P	0	0.5	0.3	0.2	0	0.1
	G6P	-0.3	0.1	0	0.1	-0.3	-0.2
	glucose	0.1	0.1	-0.3	0	-0.1	0.1
	valerate	-0.1	-0.3	0	0	0	-0.2
	butyrate	-0.6	-0.2	0	0	0	0.1
	propionate	-0.1	-0.1	-0.3	0.2	0.3	-0.2
	acetate	0.2	-0.2	0.1	0.1	0.1	0
	formate	0	-0.3	-0.1	-0.3	0	-0.1
	lactate	-0.2	0	0.5	0	0.1	0
	oxalic acid	1.7	1.3	2	1.6	1.6	1.6
	glutamate	-0.1	-0.4	-0.4	-0.3	-0.3	-0.6
	glutarate	-0.1	0.1	-0.3	0	-0.1	-0.2
	2-aminoadipate	-0.1	-0.2	-0.2	-0.2	-0.2	0
	2-oxopimelate	0.3	0.5	0.3	0.3	0.5	0.5
	pimelate	0.4	0.3	0.1	-0.2	0	0.1
	fumarate	0.1	0.1	0.1	0	0	-0.1
	adipate	-0.2	0.2	0	0.2	0	-0.1
	2-oxoadipate	0.7	0.1	0.3	0.2	0.2	0.4
	malonate	7.3	7.3	7.2	7	7.3	7.4
	maleate	8.2	7.8	7.9	8	8	7.9
	succinate	3	3.6	2.6	3	3	2.9
	L-malate	4.7	4.9	4.7	4.6	4.7	5
	oxaloacetate	0.8	0.8	1.2	1.1	0.9	1.1
	oxoglutarate	0.4	0.4	0.4	0.5	0.4	0.5
	trans-aconitate	0.6	0.9	0.9	0.6	0.7	0.8
	cis-aconitate	1.1	1.4	1.3	0.8	0.9	1
	isocitrate	0.1	0.3	0.6	0.4	0.2	0.3
	citrate	0.6	0.6	0.5	0.5	0.4	0.4

## Sheet: Figure_4C
		∆Tm
		Biological repeat 1			Biological repeat 2
		Trial 1	Trial 2	Trial 3	Trial 1	Trial 2	Trial 3
	citrullin	-0.2	-0.1	-0.2	0.1	0.2	0
	ornithine	0.8	0.2	0.3	0.4	0.4	0.3
	phosphate	0.4	0.2	0.2	0.8	0.5	1.1
	thiosulfate	1.7	1.2	1.3	1.3	1.3	1.3
	sulfate	0.5	0.5	0.5	0.5	0.5	0.7
	pyruvate	0.6	0.6	0.7	0.7	0.9	0.8
	PEP	0.4	0.4	0.3	0.4	0.3	0.5
	3PG	0.1	0	0.1	0.2	0.3	0.1
	G3P	0.3	0.2	0.8	0.4	0.4	0.5
	DHAP	-0.2	-0.4	0	0.1	-0.1	-0.1
	F16BP	-0.1	-0.2	-0.2	-0.2	0	0.1
	F6P	-0.1	-0.2	0.1	0.3	0	0
	G6P	0	0.1	0	0	0	-0.1
	glucose	-0.1	0	-0.2	-0.1	0	0
	valerate	0.7	0.9	0.6	0.9	0.8	0.9
	butyrate	0.4	0.4	0.2	0.6	0.5	0.6
	propionate	0.4	0.3	0.2	0.5	0.4	0.5
	acetate	0.7	0.2	0.2	0.4	0.3	0.3
	formate	0.2	0.3	0.2	0.3	0.4	0.4
	lactate	0.2	0.3	0.2	0.2	0	0.3
	oxalic acid	0.6	0.7	2	0.7	0.7	0.7
	glutamate	0	-0.1	-0.1	0.2	0	0
	glutarate	0.5	0.4	0.3	0.6	0.6	0.7
	2-aminoadipate	0.2	0.1	0.4	0.2	0.2	0.6
	2-oxopimelate	0.7	0.7	0.9	0.9	1	0.9
	pimelate	0.6	0.6	0.6	0.6	1.5	0.6
	fumarate	0.5	0.4	0.6	0.5	0.3	0.4
	adipate	0.1	0.2	0.5	0.5	0.5	0.3
	2-oxoadipate	2.5	2.6	2.6	2.8	2.5	2.4
	malonate	1.6	1.9	1.8	1.7	1.6	1.8
	maleate	5	4.4	4.4	4.9	4.5	4.5
	succinate	2.3	2.2	2.4	2.5	2.4	2.5
	L-malate	2.6	2.7	2.6	2.7	3.3	2.9
	oxaloacetate	1.6	1.6	1.6	2	2	2.1
	oxoglutarate	7.6	7.5	7.5	7.4	7.5	7.7
	trans-aconitate	2.6	2.6	4	2.5	2.5	4
	cis-aconitate	1.9	2.2	1.9	2.2	2.1	2.2
	isocitrate	0.8	0.8	0.8	1	1	0.9
	citrate	0.9	0.7	1	1	0.9	0.9

## Sheet: Figure_4D
		∆Tm
		Biological repeat 1			Biological repeat 2
		Trial 1	Trial 2	Trial 3	Trial 1	Trial 2	Trial 3
	citrullin	-0.6	-0.3	-0.2	-0.2	-0.1	-0.2
	ornithine	-0.1	-0.1	0.1	0.2	0	0
	phosphate	1.6	1.9	1.6	1.8	1.7	1.8
	thiosulfate	2.7	2.5	2.7	3.1	2.8	3.1
	sulfate	2.2	2.1	2.1	2.4	2.3	2.5
	pyruvate	0.1	0.1	0.2	0.3	0.2	0.3
	PEP	0.8	0.7	1.4	0.8	1.1	0.7
	3PG	0.7	1	0.8	1	0.8	0.8
	G3P	1.2	0.8	1	1	0.9	1
	DHAP	3.4	3.3	3.8	3.7	3.6	3.6
	F16BP	0.4	0.3	0.2	0.6	0.5	0.4
	F6P	1	0.9	0.8	1	0.9	1.1
	G6P	0.6	0.5	0.6	0.8	0.6	0.6
	glucose	-0.5	-0.1	-0.2	0	-0.1	-0.1
	valerate	0.3	0.1	0.1	0.2	0.2	0.2
	butyrate	1.5	0.3	0.5	0.3	0.3	0.5
	propionate	0.3	0.2	0.1	0.3	0.3	0.2
	acetate	0.1	0.2	0.1	0.4	0.3	0.3
	formate	0.2	0.3	0	0.3	0.3	0.1
	lactate	0.1	0.3	0.2	0.3	0.2	0.2
	oxalic acid	1.6	1.5	1.5	1.7	1.6	1.6
	glutamate	0.2	-0.2	-0.6	0	-0.1	-0.1
	glutarate	0.5	0.2	0.5	0.4	-0.1	0.4
	2-aminoadipate	0.1	0.1	-0.1	0.1	-0.1	0
	2-oxopimelate	0.3	0.3	0.3	0.5	0.5	0.4
	pimelate	0.6	0.6	0.3	0.3	0.3	0.2
	fumarate	0.2	0.2	0.5	0.5	0.3	0.3
	adipate	0.2	0	0	0.1	0.2	0.3
	2-oxoadipate	0.6	0.4	0.4	0.7	0.6	0.9
	malonate	1.4	1.2	1.3	1.4	1.6	1.4
	maleate	2.9	2.5	2.5	2.7	2.5	2.6
	succinate	1.1	1	0.7	1.3	1.2	1.3
	L-malate	0.7	0.9	-0.2	1.1	1	1.2
	oxaloacetate	1	0.9	1.1	1	1.1	1
	oxoglutarate	0.6	0.7	0.7	0.8	0.7	0.8
	trans-aconitate	1	0.8	0.9	1	0.7	1
	cis-aconitate	1.5	1.6	1.3	1.3	1.3	1.4
	isocitrate	0.4	0.5	0.5	0.7	0.8	0.6
	citrate	1.3	1.4	0.8	0.9	0.9	0.8

## Sheet: Figure_4E
		∆Tm
		Biological repeat 1			Biological repeat 2
		Trial 1	Trial 2	Trial 3	Trial 1	Trial 2	Trial 3
	citrullin	0.3	0.2	0.3	-0.2	0.1	0
	ornithine	0.2	0.2	-0.1	0	-0.3	0.1
	phosphate	4.9	4.8	4.9	5	4.9	5.2
	thiosulfate	4.1	4	4	4.4	4.4	4.4
	sulfate	2.6	2.2	2.8	2.6	2.6	3
	pyruvate	0.2	0.3	0.6	0.2	0.3	0.2
	PEP	4.2	4.4	4.3	4.1	3.9	4.4
	3PG	2.2	2	2	2.2	2	1.9
	G3P	2	2.1	2.2	2.1	2.1	2.1
	DHAP	1.7	1.6	1.6	1.6	1.7	1.5
	F16BP	0.7	1.2	0.9	0.8	0.9	0.7
	F6P	0.8	0.9	0.6	0.7	0.7	0.5
	G6P	1	1.1	1	1	1.1	1
	glucose	-0.1	0.3	0.2	0.1	0.1	0
	valerate	0	-1	0	0.1	1.1	-0.2
	butyrate	0.2	0.3	0.2	0.2	0	0.2
	propionate	0.3	0.3	0.4	0.4	0.4	-0.1
	acetate	0.4	0.4	0.6	0.2	0.4	0.3
	formate	0.4	0.4	0.1	0.1	0.1	0.3
	lactate	0.2	0.4	0.5	0.2	0.1	0.1
	oxalic acid	1.9	0.9	2.2	2.5	2.3	2.4
	glutamate	0.5	0	0.1	0.2	0.3	0
	glutarate	0.6	0.8	0.7	0.4	0.3	0.6
	2-aminoadipate	0.3	0.1	0.2	0.1	0.3	0.3
	2-oxopimelate	0.1	0.1	0	0.7	0.4	0.2
	pimelate	0.2	0.1	0.4	0.3	0.2	0.4
	fumarate	0.6	0.3	0.3	0.2	0.6	0.2
	adipate	0.3	0.2	0.4	0	0	0.1
	2-oxoadipate	0.9	1	0.9	0.9	0.8	0.6
	malonate	1.6	1.6	1.6	1.6	1.8	1.6
	maleate	3.5	3.1	3.3	2.7	2.5	2.8
	succinate	0.6	0.9	0.7	0.9	0.9	0.9
	L-malate	1.1	1.3	1.2	1.4	1	1
	oxaloacetate	1.7	1.9	1.8	1.4	1.5	1.4
	oxoglutarate	0.4	1.1	0.9	1.1	0.7	0.8
	trans-aconitate	2.2	1.7	1.9	1.7	1.7	1.6
	cis-aconitate	2.5	2.4	2.5	2.6	2.4	2.6
	isocitrate	1.4	1.3	2.1	1.7	1	1.5
	citrate	1.8	2.1	2	2	1.9	1.2
