# Supplementary material for: A mitochondrial carrier transports glycolytic intermediates to link cytosolic and mitochondrial glycolysis in the human gut parasite Blastocystis
Source: eLife. 2024 May 23;13:RP94187. doi: 10.7554/eLife.94187 (PMC11115451; doi:10.7554/eLife.94187)
Supplement: Figure 5—source data 1. [file elife-94187-fig5-data1.xlsx]

## Sheet: Figure_6A
	Time (secs)	bGIC-1 (malate transport)
		No internal control				bGIC-1
		Trial 1	Trial 2	Trial 1	Trial 2	Trial 1	Trial 2	Trial 3	Trial 4
	0	0	0	0.001639	0.001734	0	0	0.001982	0.00162
	10	0.00087	-0.003352	0.001906	0.002496	-0.001114	-0.002371	0.00162	0.001696
	20	0.001289	-0.005447	0.001696	0.001963	0.000314	-0.001	0.003468	0.001944
	30	0.001966	-0.001515	0.002268	0.001829	-0.001714	0.003057	0.001696	0.004154
	45	0.002933	-0.000902	0.001848	0.001639	0.001914	0.001371	0.002001	0.001786
	60	0.009927	-0.00116	0	0.001848	-0.002486	0.0038	0.002611	0.002152
	150	0.003352	0.002611	0.002115	0.002801	8.6e-05	0.0014	0.00303	0.002806
	300	0.003996	0.006736	0.002401	0.002363	-0.002543	0.001457	0.004287	0.003396
	450	0.012183	0.011312	0.002935	0.003239	0.011086	0.007114	0.005564	0.003954
	600	0.00767	-0.000129	0.003316	0.003582	-0.003172	0.005686	0.00465	0.003699
		No internal control				bGIC-1
	rates	8.5376	1.0184	0.3786	-0.308	-0.8305	4.9242	0.3677	0.5498

## Sheet: Figure_6B
	Time (secs)	bGIC-2 (malate transport)
		No internal control				bGIC-2
		Trial 1	Trial 2	Trial 1	Trial 2	Trial 1	Trial 2	Trial 3	Trial 4
	0	0	0	0.007566	0.005708	0	0	0.00584	0.005451
	10	-0.005695	0.001007	0.005177	0.008031	0.005843	0.000785	0.006619	0.004997
	20	-0.000374	0.005264	0.006239	0.005575	0.006942	0.004335	0.009215	0.006489
	30	0.000115	0.003049	0.007101	0.005708	0.010837	0.00022	0.004737	0.008177
	45	-0.000662	0.004487	0.004579	0.005774	0.007507	0.005466	0.006749	0.005646
	60	0.008773	0.001985	0.005774	0.007433	0.009518	0.012533	0.006944	0.006944
	150	0	0.005264	0.007433	0.006371	0.005183	0.004649	0.006424	0.007657
	300	-0.000777	0.003394	0.007433	0.006902	0.00578	0.003958	0.007463	0.007722
	450	0.005206	0.010355	0.007898	0.006902	0.011025	0.01002	0.008696	0.009864
	600	-0.00581	0.002819	0.009823	0.00896	0.011811	0.004649	0.010578	0.007268
		No internal control				bGIC-2
	rates	9.0764	2.2565	-1.4448	0.4242	7.5615	11.0297	0.2426	1.4205

## Sheet: Figure_6C
	Time (secs)	bGIC-1 (phosphate transport)
		No internal control				bGIC-1
		Trial 1	Trial 2	Trial 1	Trial 2	Trial 1	Trial 2	Trial 3	Trial 4
	0	0.119612	0.103438	0.0254733	0	0.0702238	0.0774528	0.0540448	0.0626507
	10	0.103438	0.106071	0.0478486	0.032358	0.0729777	0.0805509	0.0595526	0.0285715
	20	0.130896	0.136915	0.0313253	0.0306369	0.088124	0.104647	0.0254733	0.0416524
	30	0	0.129016	0.022031	0.0296042	0.0884682	0.0967299	0.0282272	0.0533563
	45	0.12563	0.13052	0.0392427	0.0292599	0.0839932	0.0891567	0.0234079	0.0302926
	60	0.139171	0.124126	0.0351119	0.0426851	0.110843	0.10809	0.0402754	0.0549114
	150	0.161364	0.144437	0.0523236	0.054389	0.117728	0.119449	0.0547333	0.139853
	300	0.219665	0.164373	0.0605853	0.0805509	0.121515	0.135284	0.0619622	0.09824
	450	0.183932	0.185813	0.0905336	0.104992	0.140103	0.215835	0.0981068	0.111968
	600	0.214023	0.187693	0.0977626	0.125301	0.156971	0.164888	0.103959	0.124838
		No internal control				bGIC-1
	rates	48.2441	22.024	2.657	10.3401	34.3542	23.8923	-22.4392	-2.1022

## Sheet: Figure_6D
	Time (secs)	bGIC-2 (phosphate transport)
		No internal control				bGIC-2
		Trial 1	Trial 2	Trial 1	Trial 2	Trial 1	Trial 2	Trial 3	Trial 4
	0	0.125727	0.145372	0.067086	0.101813	0.126668	0.0837111	0.120457	0.0861297
	10	0.136641	0.146245	0.0441978	0.0591935	0.256641	0.131074	0.233424	0.151663
	20	0.158905	0.156722	0.060772	0.0749785	0.259945	0.221394	0.286475	0.230303
	30	0.166327	0.164144	0.10497	0.0789247	0.255539	0.262148	0.306447	0.315809
	45	0.176804	0.174621	0.106548	0.0797139	0.364033	0.350816	0.408804	0.357626
	60	0.185972	0.228317	0.101024	0.217043	0.453803	0.427367	0.461231	0.484948
	150	0.19252	0.212165	0.129436	0.242299	0.606355	0.689515	0.747082	0.754571
	300	0.225261	0.227007	0.133383	0.134961	0.809024	0.80572	0.997357	1.04479
	450	0.240104	0.297292	0.219411	0.371735	0.857488	0.897692	1.08286	1.02544
	600	0.252764	0.330471	0.206783	0.423036	0.949461	0.983055	1.37808	1.19708
		No internal control				bGIC-2
	rates	61.3535	76.9916	56.3498	102.467	285.439	348.007	322.351	387.349

## Sheet: Figure_6E
	Time (secs)	bGIC-1 (sulphate transport)
		No internal control				bGIC-1
		Trial 1	Trial 2	Trial 1	Trial 2	Trial 1	Trial 2	Trial 3	Trial 4
	0	0.00703246	0.00567532	0.00459974	0.00459974	0	0.00679835	0.00919948	0.00494689
	10	0.0231948	0.00481168	0.00538083	0.00451295	0.00576569	0.00628202	0	0.00329793
	20	0.0194935	0.00666233	0	0.00407901	0.00912184	0.0114453	0.0041658	0.0041658
	30	0	0	0.0104145	0.00980699	0	0	0.00225648	0.00919948
	45	0.00974674	0.00949999	0.0027772	0.00407901	0.0147154	0.0111011	0.0048601	0.0041658
	60	0	0.0218376	0.00668264	0.00269041	0.0128222	0.015576	0.00373186	0.0128446
	150	0.0107338	0.0129545	0.00702979	0.00607513	0.0307217	0.0295169	0.00607513	0.00685622
	300	0.0498441	0.0255389	0.0136256	0.0141464	0.0371758	0.0356268	0.0109352	0.011022
	450	0.0270195	0.0465129	0.0172707	0.0106749	0.053096	0.0444905	0.0130181	0.0141464
	600	0	0.0463896	0.0163161	0.0180518	0.0684999	0.0524075	0.0162293	0.0156218
		No internal control				bGIC-1
	rates	-2.928	14.7574	0.6541	-1.2717	9.1705	8.3071	-4.4434	6.9552

## Sheet: Figure_6F
	Time (secs)	bGIC-2 (sulphate transport)
		No internal control				bGIC-2
		Trial 1	Trial 2	Trial 1	Trial 2	Trial 1	Trial 2	Trial 3	Trial 4
	0	0.00907096	0.00931612	0.0150891	0.0170418	0.0429829	0.0370461	0.0610783	0.060738
	10	0.0153226	0.0105419	0.0161542	0.00994103	0.0699363	0.068274	0.132535	0.124028
	20	0.0125032	0.0142193	0	0.0173968	0.112207	0.107932	0.173027	0.15193
	30	0	0.0165484	0.0271603	0.014734	0.192355	0.154121	0.235636	0.211137
	45	0.0212064	0.0172838	0.0186394	0.0163317	0.22382	0.228688	0.306412	0.305051
	60	0.0262322	0.0177742	0.0294681	0.0166867	0.28687	0.312398	0.342991	0.343161
	150	0.0332193	0.0329742	0.0257402	0.0330184	0.530875	0.591194	0.580329	0.630689
	300	0.031258	0.0357935	0.0365688	0.0608888	0.790435	0.764432	0.812392	0.777855
	450	0.0373871	0.0400838	0.038344	0.0410068	0.949187	0.972697	0.792657	0.870578
	600	0.0465806	0.0474387	0.0374564	0.0378114	0.9987	1.06341	0.837402	0.905966
		No internal control				bGIC-2
	rates	15.8336	9.0254	12.2576	2.2159	252.628	277.803	284.667	290.381
