# Supplementary material for: A mitochondrial carrier transports glycolytic intermediates to link cytosolic and mitochondrial glycolysis in the human gut parasite Blastocystis
Source: eLife. 2024 May 23;13:RP94187. doi: 10.7554/eLife.94187 (PMC11115451; doi:10.7554/eLife.94187)
Supplement: Figure 6—source data 1. [file elife-94187-fig6-data1.xlsx]

## Sheet: Figure_5A
	compound	Rate
		Biological repeat 1		Biological repeat 2
		Trial 1	Trial 2	Trial 1	Trial 2
	phosphate	1.1996	1.4809	5.7256	8.2325
	thiosulfate	4.6256	6.9011	8.9939	8.9682
	sulfate	0.5765	2.1529	0.3372	0.8094
	pyruvate	35.8598	37.1112	33.9639	35.2697
	PEP	3.0279	3.8824	1.7541	5.1594
	3PG	3.3309	1.713	3.4038	3.1579
	G3P	0	1.8835	0	0.8569
	DHAP	2.4942	3.5261	3.557	3.9989
	F16BP	1.8511	2.4598	2.1042	2.0375
	F6P	1.141	3.0211	2.9114	2.9294
	G6P	0	3.4723	0.0236	3.1767
	oxalic acid	5.3425	3.8145	0	3.941
	2-oxoadipate	129.274	109.598	105.578	132.216
	malonate	90.9639	90.0052	89.9825	99.9002
	maleate	118.904	113.91	142.373	130.772
	succinate	187.607	184.215	219.562	204.81
	L-malate	190.997	214.989	262.893	266.67
	oxaloacetate	74.8473	77.4228	89.2254	86.3087
	oxoglutarate	161.354	164.387	196.571	210.841
	trans-aconitate	4.1177	7.5236	8.2297	10.3702
	cis-aconitate	9.1237	8.9033	9.056	8.5819
	isocitrate	0.6988	1.5082	0.8031	2.054
	citrate	0	3.1191	2.0334	3.0923
	no internal	0.8956	1.8067	0.509	2.2299

## Sheet: Figure_5B
	compound	Rate
		Biological repeat 1		Biological repeat 2
		Trial 1	Trial 2	Trial 1	Trial 2
	phosphate	434.495	381.331	389.116	357.613
	thiosulfate	380.407	394.784	425.238	435.372
	sulfate	297.673	288.057	382.174	378.262
	pyruvate	8.7617	16.861	2.3394	5.5706
	PEP	18.1454	12.5447	0	1.6054
	3PG	18.5839	8.3366	1.7354	6.2187
	G3P	52.2102	43.3624	15.1954	18.439
	DHAP	178.05	190.281	214.074	218.405
	F16BP	8.6415	2.9353	4.3184	5.8014
	F6P	7.0494	16.0571	3.8514	9.9913
	G6P	8.8031	3.5766	5.777	3.811
	oxalic acid	154.694	152.825	133.991	163.771
	2-oxoadipate	21.9499	5.5816	26.7137	8.2621
	malonate	357.733	335.305	454.422	462.626
	maleate	334.07	332.372	466.066	517.106
	succinate	249.754	266.882	376.579	424.626
	L-malate	394.464	400.645	439.52	408.466
	oxaloacetate	4.2829	22.0196	4.0023	11.3614
	oxoglutarate	10.037	0	8.9083	3.1947
	trans-aconitate	12.3624	1.0331	7.3007	2.2266
	cis-aconitate	10.24	4.0758	2.1941	0
	isocitrate	1.2928	7.8964	4.4749	0
	citrate	8.2222	7.3827	0	18.9519
	no internal	4.6235	16.2914	1.6835	6.703

## Sheet: Figure_5C
	compound	Rate
		Biological repeat 1		Biological repeat 2
		Trial 1	Trial 2	Trial 1	Trial 2
	phosphate	1.9028	0.7402	1.6054	0.7691
	thiosulfate	1.1325	1.7939	2.8677	3.6583
	sulfate	1.2893	1.0003	2.6861	2.1065
	pyruvate	2.1292	2.1419	2.1482	2.4185
	PEP	0.8877	1.019	0	2.3184
	3PG	1.7547	3.0906	0	0.2426
	G3P	1.4376	0.836	0.5609	0.3063
	DHAP	0.1994	0.5013	0	0
	F16BP	0.3025	1.0579	0	0
	F6P	0.8477	0.2762	0.6724	1.5237
	G6P	0.2844	0.0972	0.8825	1.0286
	oxalic acid	2.049	0.6646	2.6408	2.7575
	2-oxoadipate	77.4572	85.0312	51.9171	62.1519
	malonate	138.903	111.887	109.279	93.6395
	maleate	105.778	106.269	81.6309	126.783
	succinate	212.502	176.207	153.728	172.077
	L-malate	169.053	163.816	145.584	187.804
	oxaloacetate	40.957	48.883	45.571	44.9639
	oxoglutarate	151.888	174.152	167.152	145.085
	trans-aconitate	4.3015	4.5341	0.8209	3.2281
	cis-aconitate	0.0962	0.2169	0	0.7191
	isocitrate	0.8523	0.1913	0.1959	0.3381
	citrate	0	0.1889	0.1328	0.7389
	no internal	0.5348	0	0.5049	0.8667

## Sheet: Figure_5D
	compound	Rate
		Biological repeat 1		Biological repeat 2
		Trial 1	Trial 2	Trial 1	Trial 2
	phosphate	266.292	312.83	319.993	286.6
	thiosulfate	317.887	312.275	376.343	337.165
	sulfate	284.667	290.381	218.731	219.831
	pyruvate	0	0	5.4944	0
	PEP	366.421	432.533	343.605	352.222
	3PG	61.8351	67.5509	105.797	82.5145
	G3P	83.1528	87.638	108.96	97.1136
	DHAP	225.986	230.193	240.166	232.683
	F16BP	7.9147	13.0467	12.5455	6.7835
	F6P	5.489	0.3624	5.0086	7.2255
	G6P	20.8417	0	7.6425	4.9681
	oxalic acid	181.035	163.311	241.678	181.544
	2-oxoadipate	0	4.8396	10.9946	6.0329
	malonate	32.5977	36.4302	34.9527	37.3104
	maleate	32.2358	32.4527	34.1119	36.0522
	succinate	20.3229	8.6129	11.5704	16.6806
	L-malate	3.2336	2.8871	27.2777	25.0227
	oxaloacetate	8.8298	17.0373	11.7112	13.3453
	oxoglutarate	21.7091	1.5572	68.4175	78.7679
	trans-aconitate	11.1959	7.5464	7.4591	1.1356
	cis-aconitate	82.2142	106.13	92.5768	78.1576
	isocitrate	0	11.7995	6.0654	9.8358
	citrate	20.6926	25.7372	10.6017	24.2696
	no internal	12.2576	2.2159	5.6522	2.9824
